1 **Unexpected activity of oral fosfomycin against resistant strains of *Escherichia coli* in**  
2 **murine pyelonephritis.**

3

4 **Annabelle Pourbaix, <sup>a, b, \*</sup> François Guérin, <sup>c, d, \*</sup> Charles Burdet, <sup>a, b</sup> Laurent Massias, <sup>a, e</sup>**  
5 **Françoise Chau, <sup>a, b</sup>, Vincent Cattoir, <sup>f, g</sup>, Bruno Fantin, <sup>a, b, h, \*\*</sup>**

6 **\*both authors contributed equally to this work and may be considered as first authors**

7

8 <sup>a</sup>INSERM, IAME, UMR 1137, F-75018 Paris, France

9 <sup>b</sup>Université Paris Diderot, IAME, UMR 1137, Sorbonne Paris Cité, F-75018 Paris, France

10 <sup>c</sup>Université de Caen Normandie, EA 4655 (équipe « Antibio-résistance »), F-14032 Caen,  
11 France

12 <sup>d</sup>CHU de Caen, Service de Microbiologie, F-14033 Caen, France

13 <sup>e</sup>AP-HP, Groupe Hospitalier Paris Nord Val de Seine, Laboratoire de Pharmacologie et  
14 Toxicologie, F-75018, Paris, France.

15 <sup>f</sup>CHU de Rennes, Service de Bactériologie-Hygiène hospitalière & CNR de la Résistance aux  
16 Antibiotiques, F-35033 Rennes, France.

17 <sup>g</sup>Université de Rennes 1, Unité Inserm U1230, F-35043 Rennes, France.

18 <sup>h</sup>AP-HP, Groupe Hospitalier Paris Nord Val de Seine, Service de médecine interne, F-92210  
19 Clichy, France.

20 **\*\* Corresponding author. Mailing address: Pr Bruno Fantin, IAME, UMR 1137, 16 rue Henri**  
21 **Huchard F-75018 Paris, France. Phone: +33140875227. E-mail: [bruno.fantin@aphp.fr](mailto:bruno.fantin@aphp.fr)**

22 ORCID ID: 0000-0001-7904-9402

23 Running title: Oral fosfomycin in murine pyelonephritis

24

25

26 **Abstract**

27 **Fosfomycin-tromethamine activity is well established for oral treatment of uncomplicated**  
28 **lower urinary tract infections but little is known about its potential efficacy in**  
29 **pyelonephritis. Ascending pyelonephritis was induced in mice infected with 6 strains of**  
30 ***Escherichia coli* (fosfomycin MICs: 1 µg/ml to 256 µg/ml). Urine pH was 4.5 before**  
31 **infection and 5.5-6.0 during infection. Animals were treated for 24h with fosfomycin (100**  
32 **mg/kg subcutaneously every 4 hours) and CFU were enumerated in kidneys 24h after the**  
33 **last fosfomycin injection. Peak (20.5 µg/ml at 1h) and trough (3.5 µg/ml at 4h) levels in**  
34 **plasma were comparable to those obtained in human after an oral dose of 3 grams.**  
35 **Fosfomycin treatment significantly reduced bacterial loads in kidneys (3.65 log<sub>10</sub>CFU/g**  
36 **[min-max=1.83-7.03] and 1.88 log<sub>10</sub>CFU/g [1.78-5.74] in start-of-treatment control mice**  
37 **and treated mice, respectively,  $P < 10^{-6}$ ). However, this effect was not found to differ**  
38 **across the 6 study strains ( $P = 0.71$ ) and between the 3 susceptible and the 3 resistant**  
39 **strains ( $P=0.09$ ). Three phenomena may contribute to explain this unexpected *in vivo***  
40 **activity: i) in mice, fosfomycin kidney/plasma concentrations ratio increased from 1 to 7.8**  
41 **(95% CI, 5.2; 10.4) within 24 hours; *in vitro*, when pH decreased to 5: (ii) fosfomycin MICs**  
42 **for the 3 resistant strains (64-256 µg/ml) decreased into the susceptible range (16-32**  
43 **µg/ml) and: iii) maximal growth rates significantly decreased for all strains and were the**  
44 **lowest in urine. These results suggest that local fosfomycin concentrations and**  
45 **physiological conditions may favour fosfomycin activity in pyelonephritis, even against**  
46 **resistant strains.**

47

48

49

## 50 INTRODUCTION

51 Over the last two decades, resistance to  $\beta$ -lactams among *Enterobacteriaceae* has emerged  
52 as a major public-health threat. Isolates of *Escherichia coli* producing extended-spectrum  $\beta$ -  
53 lactamases are currently responsible for a large proportion of urinary tract infections (UTIs),  
54 in the community as well as in the healthcare setting (1–3). In the current era of increasing  
55 prevalence of antibiotic resistance, fosfomycin has attracted renewed interest for the  
56 treatment of infections caused by multidrug-resistant pathogens, and especially UTIs.  
57 Indeed, it has a broad-spectrum antimicrobial activity and a favorable safety profile (4, 5).  
58 Fosfomycin-tromethamine, a soluble salt with improved bioavailability over fosfomycin, is  
59 currently recommended in single-dose as the first-line drug for the treatment of  
60 uncomplicated lower UTIs in Europe (6) and in the United States (7). However, it is unknown  
61 whether fosfomycin-tromethamine would be useful for the treatment of pyelonephritis in  
62 human, raising the questions of kidney diffusion and breakpoints to be used in  
63 pyelonephritis as compared with cystitis. Indeed, the current susceptibility breakpoint of  
64 fosfomycin for *Enterobacteriaceae* is a minimum inhibitory concentration (MIC) of 32  $\mu\text{g/ml}$   
65 according to the European Committee on Antimicrobial Susceptibility Testing (EUCAST) (8).  
66 We previously demonstrated that fosfomycin resistance in *E. coli* strains from various  
67 genetic backgrounds was associated with a decrease of *in vitro* fitness and *in vivo* virulence  
68 in a murine model of pyelonephritis (9). In addition, some mutations conferring fosfomycin  
69 resistance have been shown to decrease pilus biosynthesis and bacterial adhesion to  
70 epithelium cells (10, 11). Furthermore, Martin-Gutierrez et al. recently demonstrated that  
71 anaerobiosis and acidic pH values in urine decreased fosfomycin MICs in strains harboring  
72 chromosomal resistance mutations (12). Finally, it has been previously shown that high  
73 concentrations (1000-4000  $\mu\text{g/ml}$ ) were achieved in urine after oral administration of 3 g of  
74 fosfomycin-tromethamine in humans and remained above 100  $\mu\text{g/ml}$  for at least 30-40h  
75 (13), but data on concentrations in kidneys are scarce.  
76 However, possible limitations for the use of the oral fosfomycin-tromethamine in  
77 pyelonephritis may be anticipated, related to potentially low concentrations in kidneys as  
78 compared to urine, which in turn might be associated with limited bactericidal activity and  
79 risk of selection of resistant mutants. Indeed, the selection of spontaneous fosfomycin-

80 resistant mutants occurs at a very high rate *in vitro* (between  $10^{-7}$  to  $10^{-6}$  cells among Gram-  
81 negatives) (14).

82 Therefore, the aim of the present study was to investigate the activity of fosfomycin in a  
83 murine model of pyelonephritis due to *E. coli*, using a dosing regimen that reproduced  
84 plasma concentrations comparable to those obtained in human with the oral formulation of  
85 fosfomycin-tromethamine. Different strains with increasing levels of MICs were used in  
86 order to define the *in vivo* activity of fosfomycin-tromethamine according to strain  
87 susceptibility in this specific infection.

88

89

## 90 RESULTS

91 **Bacterial study strains.** Characteristics of bacterial strains used in the study are shown in  
92 Table 1. Three strains were susceptible to fosfomycin and three strains were resistant,  
93 according to EUCAST breakpoints (32 µg/ml). Mutations in genes known to be involved in  
94 fosfomycin resistance (*uhpB*, *uhpC*, *glpT* and *cyaA*) were detected in all strains, including  
95 those categorized as susceptible (B175 and B56) according to the current EUCAST breakpoint  
96 (Table 1). All but one strain (*E. coli* B56, producing an extended spectrum β-lactamase) were  
97 susceptible to other antibiotic families.

98 **Fosfomycin concentrations in plasma and kidneys.** Fosfomycin concentrations in plasma  
99 and kidneys after a single injection of 100 mg/kg sc are shown in Table 2. While fosfomycin  
100 concentrations were comparable in plasma and kidneys 1h following the injection,  
101 fosfomycin concentrations were higher in kidneys than in plasma over time, with mean  
102 concentrations at 24h < 1 mg/L in plasma and 6.8 mg/L in kidneys, and a kidney/plasma ratio  
103 of 7.8 (95% CI, 5.2; 10.4) (Figure 1). After a single injection, area under the concentration-  
104 time curve in kidney (AUC<sub>0-24h</sub>) was estimated to 166.6 mg.h/L, being two-fold higher than in  
105 plasma where it reached 85.0 mg.h/L. Fosfomycin AUC<sub>0-24h</sub> in plasma and kidneys after a 100  
106 mg/kg injection every 4h for 24h were 357.1 and 614.5 mg.h/L, respectively and AUC in  
107 plasma to the time a sacrifice (AUC<sub>0-44h</sub>) was 470.3 mg.h/L.

108 **Fosfomycin antimicrobial effect in murine pyelonephritis.** The bacterial loads in kidneys  
109 according to fosfomycin treatment and the infective strain are presented in Figure 2 and  
110 Table 3. Fosfomycin treatment significantly reduced the bacterial loads in kidney ( $P < 10^{-6}$ ).  
111 Median (min-max) bacterial loads in kidney were 3.7 log<sub>10</sub> CFU/g (1.8-7.0) in start-of-  
112 treatment control mice, and 1.9 log<sub>10</sub> CFU/g (1.8-5.7) in fosfomycin-treated mice. However,  
113 there was no significant difference in kidney bacterial loads according to the infective strain  
114 ( $P = 0.71$ ) and between the 3 susceptible and the 3 resistant strains ( $P = 0.09$ ). The  
115 interaction between the infective strain and the fosfomycin effect was not significant ( $P =$   
116 0.53). Similarly, the proportion of sterile kidneys in treated mice did not differ between the 6  
117 strains ( $P > 0.8$ ) (Table 3). No fosfomycin-resistant mutant was detected in kidneys at the  
118 time of sacrifice for any of the 6 strains.

119 **Pharmacokinetic/pharmacodynamic (PK/PD) analysis.** Fosfomycin AUC<sub>0-24</sub>/MIC ratios in  
120 plasma and kidneys according to strains are shown in Table 3. The relationship between the  
121 bacterial loads in kidneys and the AUC<sub>0-24</sub>/MIC ratios in plasma or kidney and the AUC<sub>0-</sub>  
122 <sub>44</sub>/MIC ratios in plasma were not significant ( $P=0.45$  for both plasma and kidney).

123 **Effect of pH on fosfomycin activity and bacterial growth rate.** In order to explain the  
124 unexpected activity of fosfomycin against both susceptible and resistant strains,  
125 investigations were performed to test the influence of acidic pH, as 85% of patients with UTI  
126 due to *E. coli* had a urine pH of  $\leq 6.5$ ) (12). Indeed, pH in uninfected urine from 5 CBA mice  
127 before experimental pyelonephritis was 4.5 and ranged from 5.5 to 6.0 in the same mice  
128 after 48h of experimental pyelonephritis.

129 **Effect of pH on in vitro fosfomycin activity.** Low pH values increased fosfomycin activity  
130 among fosfomycin-resistant strains (Table 1). Indeed, when pH decreased from 7.2 to 5,  
131 fosfomycin MICs against the 3 resistant strains decreased from 64-256  $\mu\text{g/ml}$  to 16-32  $\mu\text{g/ml}$ ,  
132 which corresponded to susceptibility according to EUCAST (8).

133 **Effect of pH and urine on in vitro bacterial growth rate.** At pH 7, maximal growth rates  
134 (MGRs) differed among the 6 studied strains, with median values ranging from 3.29 to 4.20  
135  $\text{h}^{-1}$  ( $P < 0.01$ ). For each of the 6 strains, MGR was reduced as the pH was lower (Figure 3).  
136 This reduction was statistically significant ( $P < 0.05$ ) between pH 7 and pH 5 for all strains  
137 except C05. The lowest MGR values were observed in urine with a significant reduction as  
138 compared with MGR value determined at pH 7 for all strains ( $P < 0.05$ ). For each of the 6  
139 strains, time to achieve MGR was prolonged at pH 5 as compared with pH 7 and this  
140 difference was statistically significant ( $P < 0.05$ ) for all strains except C05 (Figure 3).

141

## 142 **DISCUSSION**

143 Fosfomycin has been approved for decades as an injectable antibiotic for the treatment of  
144 systemic infections due to both Gram-positive cocci and Gram-negative bacilli, including  
145 severe infections (4, 15, 16). More recently, an oral formulation, fosfomycin-tromethamine,  
146 has rapidly become the first-line empirical treatment recommended worldwide as a single  
147 dose for acute uncomplicated lower UTIs (6, 7).

148 Here we show that, when given a regimen generating peak and trough levels in plasma in  
149 the range of those obtained in human after a single dose of the oral formulation of  
150 fosfomycin-tromethamine (approximately 20  $\mu\text{g/ml}$  and 5  $\mu\text{g/ml}$ , respectively) (17, 18),

151 fosfomycin produced a significant reduction of bacterial load after 24h of treatment in  
152 kidneys from mice with pyelonephritis. However, the unexpected result was that fosfomycin  
153 efficacy was similar whatever the study strains, susceptible or resistant to fosfomycin,  
154 according to EUCAST (8).

155 Fosfomycin activity observed in infected kidneys may result from the combination of local  
156 specific physiological conditions in urine and of fosfomycin concentrations in the kidneys.

157 Indeed, several authors have already shown that low pH values increased fosfomycin *in vitro*  
158 activity (12, 19, 20). In an acidic environment such as urine, fosfomycin is partially  
159 protonated, being in a more lipophilic state, allowing fosfomycin entry into bacteria, and  
160 resulting in higher antimicrobial activity (20). Our results support these findings, as low pH  
161 values were associated with a significant decrease in fosfomycin MIC values for resistant  
162 strains into the susceptible range (Table 1). Other factors than acidic pH may alter the  
163 growth of *E. coli* in urine, such as the lack of essential sources of metabolic elements like  
164 urea, creatinine, iron, citric acid, D-serine, or ammonia (21).

165 In the present study, we also confirmed *in vitro* that low pH values were associated with a  
166 decreased *in vitro* fitness for fosfomycin-susceptible or resistant strains, as previously  
167 reported (12) and showed that this decrease was maximal in urine for all the tested strains  
168 (Figure 2).

169 Chromosomal mutations conferring fosfomycin resistance have been associated with a high  
170 biological cost, entailing a reduced fitness (11). This fitness cost is of particular interest in  
171 uropathogenic *E. coli* strains because if the biological cost is high, the resistant bacteria will  
172 not grow at the minimal rate needed to establish infection or to invade the kidney (22, 23).  
173 We have recently shown in the same model of ascending murine pyelonephritis due to  
174 uropathogenic *E. coli* strains belonging to the B2 phylogenetic group that there was a  
175 significant reduction in kidney infection rates with fosfomycin-resistant isolates as compared  
176 with susceptible ones (9). This phenomenon may of course have favoured fosfomycin  
177 antimicrobial activity in mouse pyelonephritis and have contributed to limit the selection of  
178 fosfomycin-resistant mutants, as observed in the present study in mice with no detection of  
179 fosfomycin resistance for any strain tested.

180 On a pharmacokinetic point of view, fosfomycin concentrations over time were higher in  
181 kidneys than in plasma. This increase in drug exposure obviously favored fosfomycin activity  
182 in pyelonephritis. On a PK/PD point of view, recent studies done in mice demonstrated that

183 the PK/PD index that best predicted fosfomycin efficacy in a thigh and in UTI model was  
184 AUC/MIC ratio (24, 25). More specifically, in the thigh infection model, for *E. coli*, net stasis  
185 was observed at a median AUC/MIC ratio value of 19.3 and one-log kill was observed at a  
186 median AUC/MIC ratio value of 97.5 (24). According to these data, since a similar dosing  
187 regimen was used in the present study in all mice and generated in plasma the same  $AUC_{0-44h}$   
188 of 470.3 mg.h/L at the time of sacrifice, the target value for net stasis would be achieved  
189 only for strains with an MIC of 24  $\mu\text{g/ml}$  or lower, and the one-log kill target would be  
190 achieved only for strains with an MIC of 4  $\mu\text{g/ml}$  or lower. The “higher than expected”  
191 fosfomycin activity observed in our model (Table 3) is probably the consequence of the  
192 overall favorable local physiological conditions discussed above, reducing the MIC, fitness  
193 and virulence of resistant strains and associated with kidney concentrations favouring  
194 fosfomycin activity in pyelonephritis.

195 The lack of correlation we observed between AUC/MIC ratio in plasma and CFUs in kidneys  
196 was related to the fact that, on one hand, all the mice were treated with the same dosing  
197 regimen and therefore exposed to the same AUC, and on the other hand, local MICs of  
198 resistant strains in urine became very similar to those from susceptible strains. Thus, as AUC  
199 was similar for all strains and MICs in local conditions not as different as in standard  
200 conditions (Table 1), the AUC/MIC ratio reached a “plateau” that precluded to investigate  
201 the PKPD relationship and did not allow us to determine an MIC breakpoint.

202 Several limitations of our study, due to experimental conditions, should be taken into  
203 account when extrapolating the data as they could limit the probability for selection of  
204 fosfomycin-resistant mutants *in vivo*: i) bacterial loads in kidneys before fosfomycin  
205 treatment were moderate, and no spontaneous mortality is observed in this model; ii)  
206 duration of fosfomycin treatment was limited to 24h, a short duration of time to select for  
207 resistant mutants; however, it must be acknowledge that this is very similar to the situation  
208 in human after an oral single dose of fosfomycin; iii) the fosfomycin dosing regimen used in  
209 the present study generated an  $AUC_{0-24h}$  that corresponded approximately to what would  
210 be obtained in human after two doses of oral fosfomycin-tromethamine (15, 16, 18), as  
211 repeated oral doses is a dosing regimen that is under investigation for other situations than  
212 cystitis in women (19); iv) finally, we did not perform a group of end-of-treatment control  
213 mice which would have help to analyze the relative part of spontaneous bacterial clearance  
214 from the kidneys and the antibacterial effect of fosfomycin.



215 In conclusion, our results suggest that fosfomycin-tromethamine oral formulation might be  
216 of interest in human for the treatment of UTI with parenchymal infections, such as  
217 pyelonephritis, due to favorable local physiological conditions and kidney concentrations.  
218 Our results suggest that repeated dosing of fosfomycin-tromethamine should be  
219 investigated for the treatment of uncomplicated pyelonephritis in women.

220

## 221 **MATERIALS AND METHODS**

### 222 **Bacterial strains.**

223 Six bacterial strains of *E. coli* were used (Table 1), with MICs of fosfomycin ranging from the  
224 susceptible to resistant range (1 to 256 µg/ml). The reference wild-type *E. coli* CFT073  
225 (O6:K2:H1) strain (25) was previously used to set up a murine model of pyelonephritis by our  
226 group (26, 27). Other strains were clinical isolates from urinary tract infections (UTIs), except  
227 *E. coli* MUT2 that was a fosfomycin-resistant mutant selected *in vitro* from *E. coli* CFT073.  
228 We selected strains belonging to phylogenetic group B2 since such strains are most  
229 frequently responsible for UTIs in humans and carry the most important virulence factors  
230 (28, 29).

231 ***In vitro* fosfomycin activity.** MICs of fosfomycin (Sanofi-Aventis, Paris, France) were  
232 determined by the dilution method in Mueller-Hinton agar (pH 7.2) in accordance with  
233 EUCAST guidelines (9), with 25 µg/ml glucose-6-phosphate (G6P) (Sigma–Aldrich, Saint-  
234 Quentin Fallavier, France) added in the medium. MICs of fosfomycin were also determined  
235 at pH 5 and 6. Each *in vitro* experiment was replicated at least in three independent  
236 experiments and the median values were reported for each strain.

237 **Mechanisms of fosfomycin resistance.** Known mechanisms of fosfomycin resistance were  
238 determined for each strain exhibiting an MIC of fosfomycin  $\geq 8$  µg/ml as several of them have  
239 been found in strains with MICs from the susceptible range (9). Mutations in the genes  
240 involved in fosfomycin chromosomal resistance (i.e., *murA*, *glpT*, *uhpT*, *cyaA*, *ptsI*, *uhpA*,  
241 *uhpB*, *uhpC*) were determined by nucleotide sequencing after amplification by PCR, as  
242 previously described (9). The amino acid sequences were compared with those of *E. coli*  
243 CFT073 and K-12.

244 ***In vitro* bacterial growth rate.** Growth rates at 37°C were measured in Luria-Bertani (LB)  
245 broth with various pH (5, 6, and 7) and in sterile-filtered pooled human male urine (pH=6), as  
246 previously described (9). For each strain and condition, maximal growth rate (MGR) and time

247 to achieve MGR (Tmax) were measured in three independent experiments and the median  
248 values were reported for each strain.

249 **Murine pyelonephritis model.** We used the ascending, unobstructed UTI mouse model  
250 previously developed by our group (26, 27). Eight-week-old immunocompetent CBA female  
251 mice (weight 20–23 g) were used. Bacterial inocula were obtained by overnight incubation in  
252 LB broth followed by centrifugation at  $8000 \times g$  for 15 min. Pellets were suspended in 1 mL  
253 of sterile saline solution to a final inoculum of  $10^9$  CFU/ml. Pyelonephritis was induced after  
254 general anesthesia (with an intraperitoneal administration of 150 mg/kg of body weight of  
255 ketamine and 0.5 mg/kg xylazine) by injecting 50  $\mu$ L ( $10^7$  CFU of *E. coli*) into the bladder  
256 through a urethral catheter. Urine was sampled for pH was determination in 5 mice just  
257 before bacterial inoculation and 48h after infection. For each strain, 18-24 mice were  
258 infected. Two days after inoculation, 8 to 14 mice were sacrificed before treatment (start-of-  
259 treatment controls), and 9-10 were treated over 24h by subcutaneous injections (fosfomycin  
260 100 mg/kg q4h for 24h). In order to avoid unnecessary mice killing, we did not constitute a  
261 group of untreated mice (end-of-treatment controls) because previous study setting up the  
262 model showed that bacterial counts in kidney were stable for at least 5 to 10 days (26).  
263 Treated mice were sacrificed 24h after the last antibiotic injection to avoid the carry-over  
264 effect. Kidneys were aseptically removed and were homogenized in 1 mL of saline solution.  
265 Then, 100  $\mu$ L of the solution or its dilution were spread onto MH agar plates and incubated  
266 at 37°C for 24 h. Selection of resistant mutants after *in vivo* exposure was sought by plating  
267 100  $\mu$ L of kidney homogenates onto MH agar containing fosfomycin at a concentration of 4  
268 times the MIC for fosfomycin-susceptible strains and 2 times the MIC for fosfomycin-  
269 resistant strains. Kidneys were considered sterile if no colony grew on agar plate. In the  
270 absence of bacterial growth, the  $\log_{10}$  CFU/g of kidney was calculated considering the  
271 growth of one colony and the weight of the kidney, as the method detection limit. This  
272 corresponded approximately to 1.8  $\log_{10}$  CFU/g of kidney. Assessment criteria for each strain  
273 were: i) bacterial load in kidneys expressed as  $\log_{10}$  CFU/g; ii) the percentage of sterile  
274 kidneys.

275 **Fosfomycin dosing regimen.** Single-dose plasma pharmacokinetic studies were performed  
276 on eight-week-old CBA female mice (weight 20–23 g) in order to determine the therapeutic  
277 regimen that best reproduced peak and trough plasma levels obtained in humans with a  
278 daily oral-dose of 3 grams of fosfomycin-tromethamine (20 and 5  $\mu$ g/ml, respectively) (15,

279 18, 19). Dosing interval was chosen accordingly to reproduce area under the concentration-  
280 time curve (AUC) in the range of that obtained in humans with a single oral-dose of 3 grams  
281 of fosfomycin-tromethamine (*ie* up to 228 mg.h/liter, as compared with a range of 1400 to  
282 1800 mg.h/L in human with the iv route) (13, 15, 18) since fosfomycin AUC/MIC ratio is the  
283 PK/PD index most closely linked to in vivo efficacy (24). This regimen was determined as 100  
284 mg/kg every 4 h (15, 18, 19). Total drug concentrations were utilized in PK/PD analyses, as  
285 fosfomycin is not bound to plasma protein (15, 18).

286 **Fosfomycin sampling in plasma and kidney.** Blood samples of at least 500  $\mu$ L were obtained  
287 by intracardiac puncture from 4 anesthetized mice at 5 different intervals after a single  
288 subcutaneous injection of fosfomycin (100 mg/kg): 1h, 2h, 4h, 6h and 24h. After blood  
289 collection, plasma was separated by centrifugation. Kidneys were also removed at the same  
290 sampling times.

291 **Fosfomycin assays in plasma and kidneys.** Concentrations of fosfomycin were determined  
292 using a triple quadrupole mass spectrometer, Aquity $\text{\textcircled{R}}$  TQD (Waters, St Quentin en Yvelines),  
293 operated with negative electrospray ionization. Instrument parameters were optimized for  
294 fosfomycin (137  $\rightarrow$  79 m/z) and propylphosphonic acid (internal standard) (123  $\rightarrow$  79 m/z)  
295 transitions. Fosfomycin was extracted from samples (plasma and kidneys) via protein  
296 precipitation with acetonitrile. The chromatographic separation took place on an Acquity $\text{\textcircled{R}}$   
297 UPLC BEH HILIC column with the dimensions 100 mm x 2.1 mm and 1.7  $\mu$ m particle size  
298 (Waters, St Quentin en Yvelines). The lower limit of quantitation was 1 mg/L. Intraday and  
299 inter-day coefficients of variation in plasma were 8.5 and 11.1%, respectively, at  
300 concentrations ranging from 5 to 250  $\mu$ g/ml. The possible influence of co-extracted matrix  
301 compound on detectability of target analyses was checked.

302 **Fosfomycin PK/PD analysis.** For the PK analysis, concentration data of fosfomycin in plasma  
303 and kidney were separately fitted to 2-compartments models with extravascular  
304 administration (30), pooling data of all mice and using the 'optim' package of R statistical  
305 software (v3.4.0). For each fit, the pharmacokinetic model could thus be written as:  
306  $C = Ae^{-\alpha t} + Be^{-\beta t} - (A + B)e^{-k_a t}$ . Parameters to be estimated were A and B, first and  
307 second macro-constants;  $\alpha$  and  $\beta$ , first and second-rate constants, and  $k_a$ , absorption rate  
308 constant. Data below the LLOQ were imputed to the LLOQ. We derived the AUC<sub>0-24h</sub> in  
309 plasma (AUC<sub>0-24h,plasma</sub>) and kidney (AUC<sub>0-24h,kidney</sub>) and in in plasma to the time of sacrifice  
310 (AUC<sub>0-44h</sub>) from the model with a 100mg/kg administration of fosfomycin every 4 hours.

311 Finally,  $AUC_{0-24h}/MIC$  ratios were determined in plasma and kidneys for each strain used in  
312 the murine pyelonephritis model. We studied the relationship between the bacterial load in  
313 kidney and  $AUC_{0-24h}/MIC$  ratios in plasma or kidney using linear regressions.

314 **Statistical analysis.** MGRs of bacterial strains at pH 7, and studied the effect of pH on MGRs  
315 and time to achieve MGR using a Kruskal-Wallis non parametric test.

316 A 2-way analysis of variance was performed to study the effect of the infective strains and  
317 fosfomycin treatment on the bacterial loads in kidneys, and tested the interaction between  
318 the infective strain susceptibility and the treatment effect. We also compared the proportion  
319 of sterile kidney in fosfomycin-treated mice according to the infective strain using a Fisher  
320 exact test. Bacterial loads in kidneys from treated mice were compared between the 3  
321 susceptible and the 3 resistant strains by the Mann and Whitney non parametric test. The  
322 relationship between the bacterial load in kidney and the  $AUC_{0-24h}/MIC$  and  $AUC_{0-44h}/MIC$   
323 ratios in plasma and the  $AUC_{0-24h}/MIC$  ratio in kidneys was studied using linear regression.

324 Type-I error was set at 0.05, and two-tailed tests were used. All analyses were performed  
325 using R statistical software.

326

327

328 **ACKNOWLEDGEMENTS**

329 **Funding.** This study was supported by internal funding.

330 **Transparency declarations.** Annabelle Pourbaix received Grants from the “Fondation pour la  
331 Recherche Médicale”, and from the “Société de Pathologie Infectieuse de Langue Française”  
332 for this work.

333 **Acknowledgements.** We are indebted to Sara Dion and Louis Gary for technical assistance  
334 and Professor France Mentre for statistical assistance.

335 **Conflict of interest.** All authors: None to declare.

336 **Ethical approval.** The pyelonephritis protocol (n° APAFIS#4950-2016021211417682 v4) was  
337 approved by the French Ministry of Research and by the ethical committee for animal  
338 experiment.

339

340 **REFERENCES**

- 341 1. Coque TM, Novais A, Carattoli A, Poirel L, Pitout J, Peixe L, Baquero F, Cantón R,  
342 Nordmann P. 2008. Dissemination of clonally related *Escherichia coli* strains expressing  
343 extended-spectrum beta-lactamase CTX-M-15. *Emerg Infect Dis* 14:195–200.
- 344 2. Livermore DM, Canton R, Gniadkowski M, Nordmann P, Rossolini GM, Arlet G, Ayala J,  
345 Coque TM, Kern-Zdanowicz I, Luzzaro F, Poirel L, Woodford N. 2007. CTX-M: changing  
346 the face of ESBLs in Europe. *J Antimicrob Chemother* 59:165–174.
- 347 3. Nicolas-Chanoine M-H, Gruson C, Bialek-Davenet S, Bertrand X, Thomas-Jean F, Bert F,  
348 Moyat M, Meiller E, Marcon E, Danchin N, Noussair L, Moreau R, Leflon-Guibout V.  
349 2013. 10-Fold increase (2006-11) in the rate of healthy subjects with extended-  
350 spectrum  $\beta$ -lactamase-producing *Escherichia coli* faecal carriage in a Parisian check-up  
351 centre. *J Antimicrob Chemother* 68:562–568.
- 352 4. Falagas ME, Kastoris AC, Kapaskelis AM, Karageorgopoulos DE. 2010. Fosfomycin for  
353 the treatment of multidrug-resistant, including extended-spectrum beta-lactamase  
354 producing, Enterobacteriaceae infections: a systematic review. *Lancet Infect Dis* 10:43–  
355 50.
- 356 5. Wenzler E, Ellis-grosse EJ, Rodvold KA. 2017. Pharmacokinetics, Safety, and Tolerability  
357 of Single-Dose Intravenous (ZTI-01) and Oral Fosfomycin in Healthy Volunteers.  
358 *Antimicrob Agents Chemother*. 61: e00775-17
- 359 6. Naber KG, Bergman B, Bishop MC, Bjerklund-Johansen TE, Botto H, Lobel B, Jinenez  
360 Cruz F, Selvaggi FP, Urinary Tract Infection (UTI) Working Group of the Health Care  
361 Office (HCO) of the European Association of Urology (EAU). 2001. EAU guidelines for  
362 the management of urinary and male genital tract infections. *Urinary Tract Infection*  
363 (UTI) Working Group of the Health Care Office (HCO) of the European Association of  
364 Urology (EAU). *Eur Urol* 40:576–588.
- 365 7. Gupta K, Hooton TM, Naber KG, Wullt B, Colgan R, Miller LG, Moran GJ, Nicolle LE, Raz  
366 R, Schaeffer AJ, Soper DE, Infectious Diseases Society of America, European Society for  
367 Microbiology and Infectious Diseases. 2011. International clinical practice guidelines for  
368 the treatment of acute uncomplicated cystitis and pyelonephritis in women: A 2010  
369 update by the Infectious Diseases Society of America and the European Society for  
370 Microbiology and Infectious Diseases. *Clin Infect Dis Off Publ Infect Dis Soc Am* 52:e103-  
371 120.
- 372 8. EUCAST. 2018. European Committee on Antimicrobial Susceptibility Testing -  
373 *Breakpoint table for interpretation of MICs and zone diameters, version 8.1, 2018-05-*  
374 *15.* [http://www.eucast.org/fileadmin/src/media/PDFs/EUCAST\\_files/Breakpoint\\_tables/  
375 v\\_8.1\\_Breakpoint\\_Tables.pdf](http://www.eucast.org/fileadmin/src/media/PDFs/EUCAST_files/Breakpoint_tables/v_8.1_Breakpoint_Tables.pdf)

- 376 9. Pourbaix A, Guérin F, Lastours V de, Chau F, Auzou M, Bouley E, Cattoir V, Fantin B.  
377 2017. Biological cost of fosfomycin resistance in *Escherichia coli* in a murine model of  
378 urinary tract infection. *Int J Med Microbiol IJMM* 307:452–459.
- 379 10. Båga M, Göransson M, Normark S, Uhlin BE. 1985. Transcriptional activation of a pap  
380 pilus virulence operon from uropathogenic *Escherichia coli*. *EMBO J* 4:3887–3893.
- 381 11. Marchese A, Gualco L, Debbia EA, Schito GC, Schito AM. 2003. In vitro activity of  
382 fosfomycin against gram-negative urinary pathogens and the biological cost of  
383 fosfomycin resistance. *Int J Antimicrob Agents* 22 Suppl 2:53–59.
- 384 12. Martín-Gutiérrez G, Docobo-Pérez F, Rodríguez-Beltrán J, Rodríguez-Martínez JM, Aznar  
385 J, Pascual A, Blázquez J. 2018. Urinary Tract Conditions Affect Fosfomycin Activity  
386 against *Escherichia coli* Strains Harboring Chromosomal Mutations Involved in  
387 Fosfomycin Uptake. *Antimicrob Agents Chemother* 62. e1899-17
- 388 13. Wenzler E, Ellis-grosse EJ, Rodvold KA. 2017. Pharmacokinetics, Safety, and Tolerability  
389 of Single-Dose Intravenous (ZTI-01) and Oral Fosfomycin in Healthy Volunteers.  
390 *Antimicrob Agents Chemother*. 61 e00775-17
- 391 14. Karageorgopoulos DE, Wang R, Yu X-H, Falagas ME. 2012. Fosfomycin: evaluation of the  
392 published evidence on the emergence of antimicrobial resistance in Gram-negative  
393 pathogens. *J Antimicrob Chemother* 67:255–268.
- 394 15. Dijkmans AC, Zacarías NVO, Burggraaf J, Mouton JW, Wilms EB, van Nieuwkoop C, Touw  
395 DJ, Stevens J, Kamerling IMC. 2017. Fosfomycin: Pharmacological, Clinical and Future  
396 Perspectives. *Antibiot Basel Switz* 6.
- 397 16. Patel SS, Balfour JA, Bryson HM. 1997. Fosfomycin tromethamine. A review of its  
398 antibacterial activity, pharmacokinetic properties and therapeutic efficacy as a single-  
399 dose oral treatment for acute uncomplicated lower urinary tract infections. *Drugs*  
400 53:637–656.
- 401 17. Wenzler E, Bleasdale SC, Sikka M, Bunnell KL, Finnemeyer M, Rosenkranz SL, Danziger  
402 LH, Rodvold KA; Antibacterial Resistance Leadership Group. 2018. Phase I Study To  
403 Evaluate the Pharmacokinetics, Safety, and Tolerability of Two Dosing Regimens of Oral  
404 Fosfomycin Tromethamine in Healthy Adult Participants. *Antimicrob Agents*  
405 *Chemother*. 62: e00464-18.
- 406 18. Grayson ML, Macesic N, Trevillyan J, Ellis AG, Zeglinski PT, Hewitt NH, Gardiner BJ,  
407 Frauman AG. 2015. Fosfomycin for Treatment of Prostatitis: New Tricks for Old Dogs.  
408 *Clin Infect Dis Off Publ Infect Dis Soc Am* 61:1141–1143.
- 409 19. Burian A, Erdogan Z, Jandrisits C, Zeitlinger M. 2012. Impact of pH on activity of  
410 trimethoprim, fosfomycin, amikacin, colistin and ertapenem in human urine.  
411 *Pharmacology* 90:281–287.
- 412 20. Fedrigo NH, Mazucheli J, Albiero J, Shinohara DR, Lodi FG, Machado ACDS, Sy SKB,  
413 Tognim MCB. 2017. Pharmacodynamic Evaluation of Fosfomycin against *Escherichia coli*

- 414 and *Klebsiella* spp. from Urinary Tract Infections and the Influence of pH on Fosfomycin  
415 Activities. *Antimicrob Agents Chemother* 61.
- 416 21. Mann R, Mediati DG, Duggin IG, Harry EJ, Bottomley AL. 2017. Metabolic Adaptations of  
417 Uropathogenic *E. coli* in the Urinary Tract. *Front Cell Infect Microbiol* 7:241. doi:  
418 10.3389/fcimb.2017.00241.
- 419 22. Nilsson AI, Berg OG, Aspevall O, Kahlmeter G, Andersson DI. 2003. Biological costs and  
420 mechanisms of fosfomycin resistance in *Escherichia coli*. *Antimicrob Agents Chemother*  
421 47:2850–2858.
- 422 23. Gordon DM, Riley MA. 1992. A theoretical and experimental analysis of bacterial  
423 growth in the bladder. *Mol Microbiol* 6:555–562.
- 424 24. Lepak AJ, Zhao M, VanScoy B, Taylor DS, Ellis-Grosse E, Ambrose PG, Andes DR. 2017. In  
425 Vivo Pharmacokinetics and Pharmacodynamics of ZTI-01 (Fosfomycin for Injection) in  
426 the Neutropenic Murine Thigh Infection Model against *Escherichia coli*, *Klebsiella*  
427 *pneumoniae*, and *Pseudomonas aeruginosa*. *Antimicrob Agents Chemother* 61:e00476-  
428 17.
- 429 25. Mobley HL, Green DM, Trifillis AL, Johnson DE, Chippendale GR, Lockett CV, Jones BD,  
430 Warren JW. 1990. Pyelonephritogenic *Escherichia coli* and killing of cultured human  
431 renal proximal tubular epithelial cells: role of hemolysin in some strains. *Infect Immun*  
432 58:1281–1289.
- 433 26. Labat F, Pradillon O, Garry L, Peuchmaur M, Fantin B, Denamur E. 2005. Mutator  
434 phenotype confers advantage in *Escherichia coli* chronic urinary tract infection  
435 pathogenesis. *FEMS Immunol Med Microbiol* 44:317–321.
- 436 27. Lepeule R, Ruppé E, Le P, Massias L, Chau F, Nucci A, Lefort A, Fantin B. 2012. Cefoxitin  
437 as an alternative to carbapenems in a murine model of urinary tract infection due to  
438 *Escherichia coli* harboring CTX-M-15-type extended-spectrum  $\beta$ -lactamase. *Antimicrob*  
439 *Agents Chemother* 56:1376–1381.
- 440 28. Clermont O, Bonacorsi S, Bingen E. 2000. Rapid and simple determination of the  
441 *Escherichia coli* phylogenetic group. *Appl Environ Microbiol* 66:4555–4558.
- 442 29. Tenaillon O, Skurnik D, Picard B, Denamur E. 2010. The population genetics of  
443 commensal *Escherichia coli*. *Nat Rev Microbiol* 8:207–217.
- 444 30. Zykov IN, Samuelsen Ø, Jakobsen L, Småbrekke L, Andersson DI, Sundsfjord A, Frimodt-  
445 Møller N. 2018. Pharmacokinetics and Pharmacodynamics of Fosfomycin and Its Activity  
446 against Extended-Spectrum- $\beta$ -Lactamase-, Plasmid-Mediated AmpC-, and  
447 Carbapenemase-Producing *Escherichia coli* in a Murine Urinary Tract Infection Model.  
448 *Antimicrob Agents Chemother* 62: e02560-17. doi: 10.1128/AAC.02560-17.

449



1 **Table 1.** Susceptibility to fosfomycin of *E. coli* strains used in this study, according to pH and media.

2

| Strains                                                  | CFT073                 | B56                    | B175                         | MUT2               | C05                    | C114                          |
|----------------------------------------------------------|------------------------|------------------------|------------------------------|--------------------|------------------------|-------------------------------|
| Origin                                                   | Urine clinical isolate | Urine clinical isolate | Urine clinical isolate       | Mutant from CFT073 | Urine clinical isolate | Urine clinical isolate        |
| Phylogenetic group                                       | B2                     | B2                     | B2                           | B2                 | B2                     | B2                            |
| Fosfomycin MIC* according to pH:                         |                        |                        |                              |                    |                        |                               |
| pH 7.2                                                   | 1                      | 8                      | 32                           | 64                 | 128                    | 256                           |
| pH 6                                                     | 1                      | 8                      | 32                           | 16                 | 64                     | 32                            |
| pH 5                                                     | 1                      | 16                     | 32                           | 16                 | 32                     | 32                            |
| Susceptibility categorization according to pH 7.2/pH 5** | S / S                  | S / S                  | S / S                        | R / S              | R / S                  | R / S                         |
| Detected mutation(s) of fosfomycin resistance            | None                   | UhpB (P169S)           | CyaA (L125F),<br>UhpC (T72I) | UhpB (G469R)       | UhpC (Q210X)           | UhpC (Q132X),<br>GlpT (G144D) |

3

4 \*: MICs are in µg/ml

5 \*\*: S denotes susceptible and R resistant, according to EUCAST breakpoints <sup>7</sup>

6

1 **Table 2.** Fosfomycin concentrations in plasma and kidneys from CBA female mice after a  
2 single injection of 100 mg/kg given subcutaneously. Each set of values for a given sample  
3 time corresponds to the mean of 4 mice (min-max).

---

Fosfomycin concentrations ( $\mu\text{g/ml}$ ) in:

---

| Time | Plasma            | Kidneys            |
|------|-------------------|--------------------|
| 1h   | 20.5 (9.0 – 33.5) | 20.8 (11.4 – 27.5) |
| 4h   | 3.5 (2.8 – 4.8)   | 8.4 (6.7 – 11.4)   |
| 24h  | < 1 (<1 - < 1)    | 6.8 (4.0 – 10.1)   |

---

4

**Table 3.** Pharmacokinetics/pharmacodynamics of fosfomycin (FOS) in murine pyelonephritis due to *E. coli* after a 24h treatment.

| Strains | FOS MIC<br>(µg/ml) | FOS AUC <sub>0-24</sub><br>plasma/MIC | FOS AUC <sub>0-24</sub><br>kidney/MIC | Median log <sub>10</sub> CFU counts/g of kidneys<br>[range min-max] |                                      |
|---------|--------------------|---------------------------------------|---------------------------------------|---------------------------------------------------------------------|--------------------------------------|
|         |                    |                                       |                                       | Start-of-treatment control mice<br>(sterile/ total)                 | FOS treated mice<br>(sterile/ total) |
| CFT073  | 1                  | 357.1                                 | 614.5                                 | 3.9 [1.9-5.3] (0/11)                                                | 2.0 [1.8-5.1] (4/9)                  |
| B56     | 8                  | 44.6                                  | 76.8                                  | 3.0 [2.5-6.5] (0/11)                                                | 1.8 [1.8-2.8] (4/10)                 |
| B175    | 32                 | 11.2                                  | 19.2                                  | 3.4 [2.1-7.0] (0/11)                                                | 1.9 [1.8-4.9] (4/10)                 |
| MUT2    | 64                 | 5.6                                   | 9.6                                   | 3.7 [2.2-6.8] (0/12)                                                | 1.9 [1.8-5.5] (5/10)                 |
| C05     | 128                | 2.8                                   | 4.8                                   | 3.7 [2.3-4.9] (0/8)                                                 | 2.7 [1.9-4.1] (3/10)                 |
| C114    | 256                | 1.4                                   | 2.4                                   | 3.7 [1.8-5.8] (0/14)                                                | 1.9 [1.8-5.7] (6/10)                 |

CFU: colony-forming units, FOS: fosfomycin, MIC: minimum inhibitory concentration. Median (min-max) bacterial loads in kidney were 3.7 log<sub>10</sub> CFU/g (1.8; 7.0) in start-of-treatment control mice, and 1.9 log<sub>10</sub> CFU/g (1.8; 5.7) in fosfomycin-treated mice ( $P < 10^{-6}$ ). Lower limit of detection was 1.8 log<sub>10</sub> CFU/g of kidney.

**Figure 1.** Ratio of the kidney/plasma fosfomycin concentrations in CBA mice after a single injection of 100 mg/kg sc.

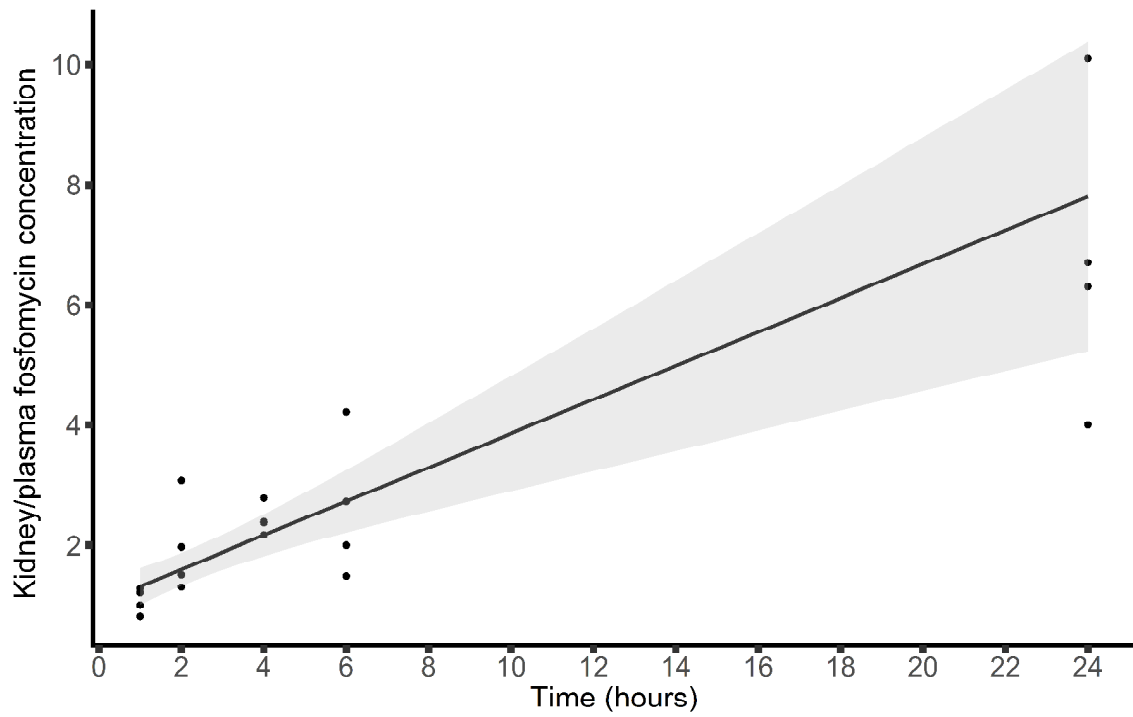

Curve represents the mean ratio predicted by the model. Dark area represents the 95% confidence interval of the prediction. Each point represents the observed ratio for each sample.

**Figure 2.** Bacterial counts ( $\log_{10}$  CFU per gram of kidney) of *E. coli* in mice with pyelonephritis treated or not for 24h with fosfomycin 100 mg/kg sc every 4 hours, according to study strains.

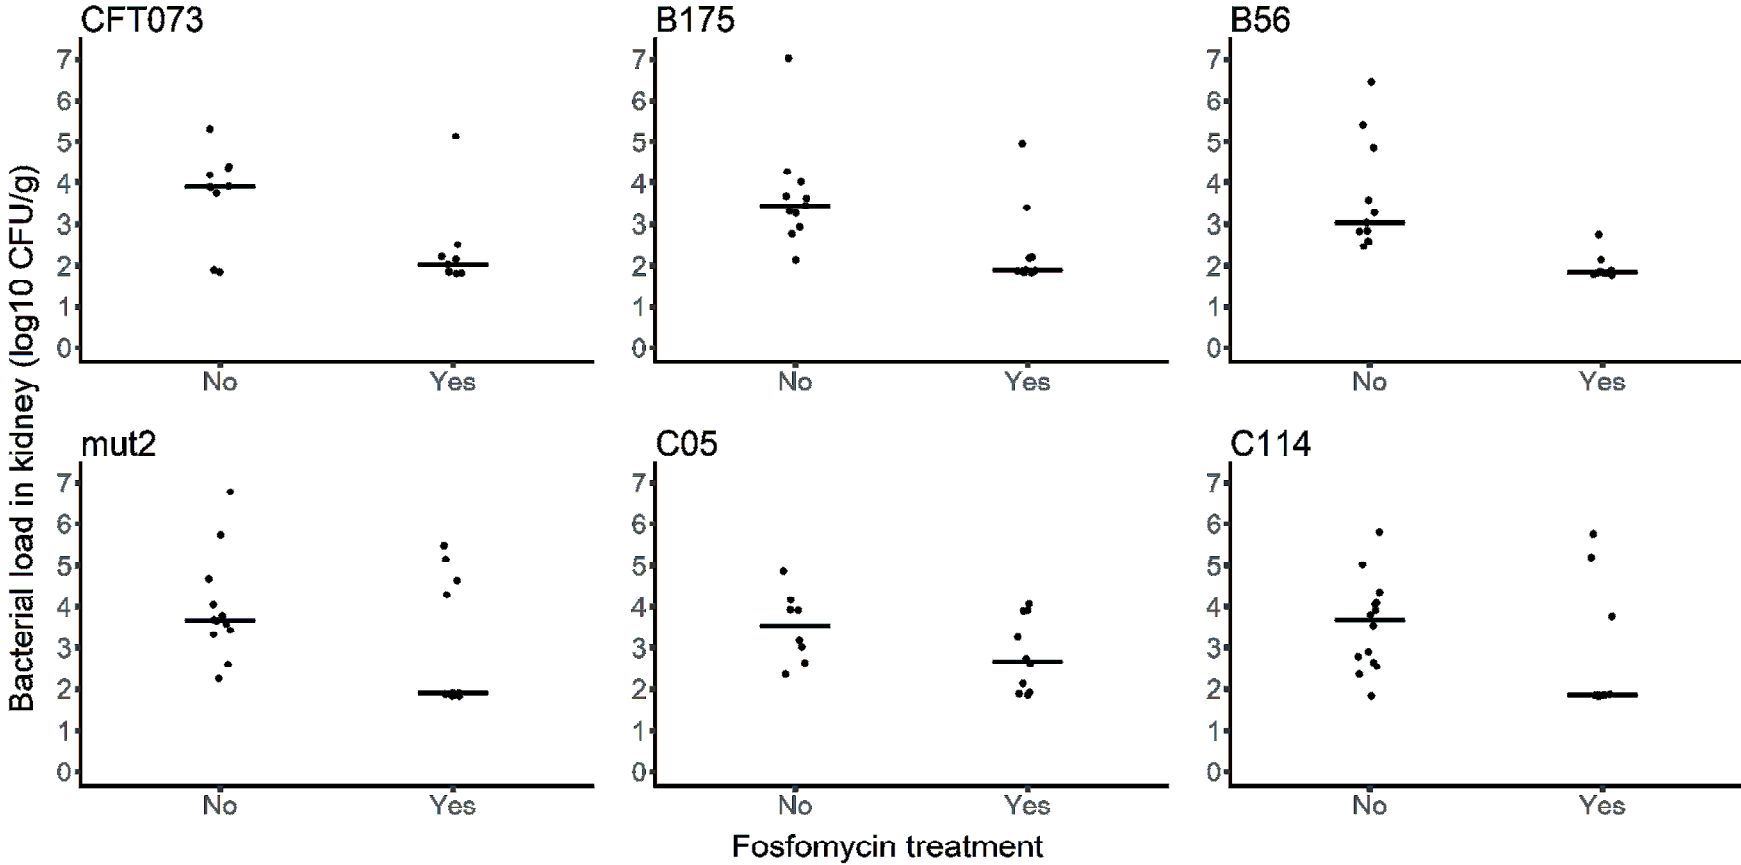

“No fosfomycin treatment” groups corresponded to start-of-treatment control mice. Each circle represents a mouse; horizontal bars represent median values. Fosfomycin treatment significantly reduced the bacterial loads in kidney ( $P < 10^{-6}$ ). The effect of the infective strain on the bacterial load in kidney was not significant ( $P = 0.53$ ), as was the interaction between the type of strain and the fosfomycin effect ( $P = 0.71$ ).

1 **Figure 3.** In vitro maximal growth rates (upper panel) and time to achieve maximal growth  
2 rate (lower panel) for each study strain according to pH in Luciani-Bertani or in urine. Each  
3 value is the median of three independent experiments. Brackets represent standard  
4 deviations.

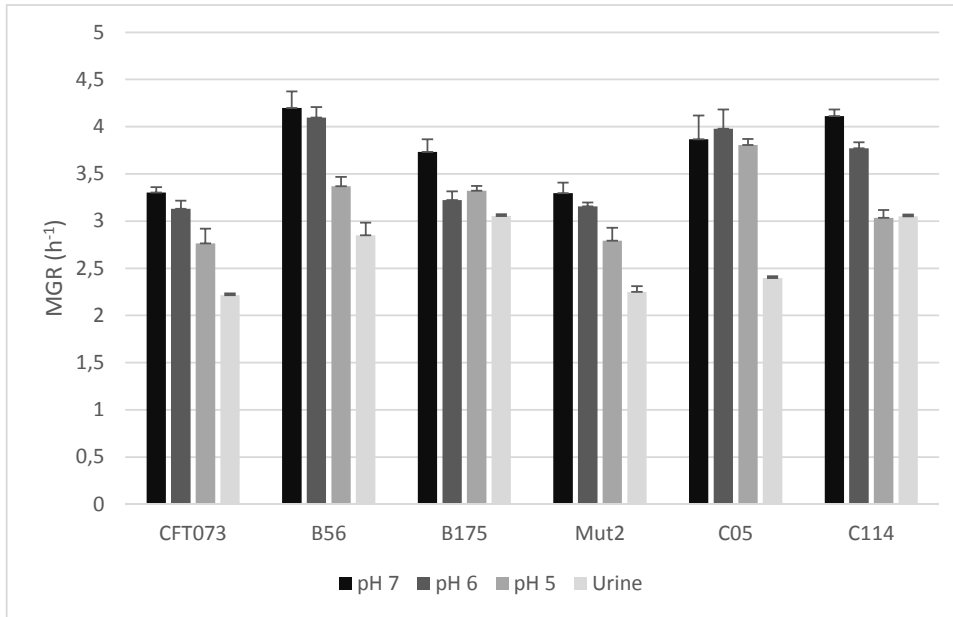

5

6 MGR was significantly reduced ( $P < 0.05$ ) in urine as compared with pH7 for all strains and at  
7 pH5 for all strains except C05.

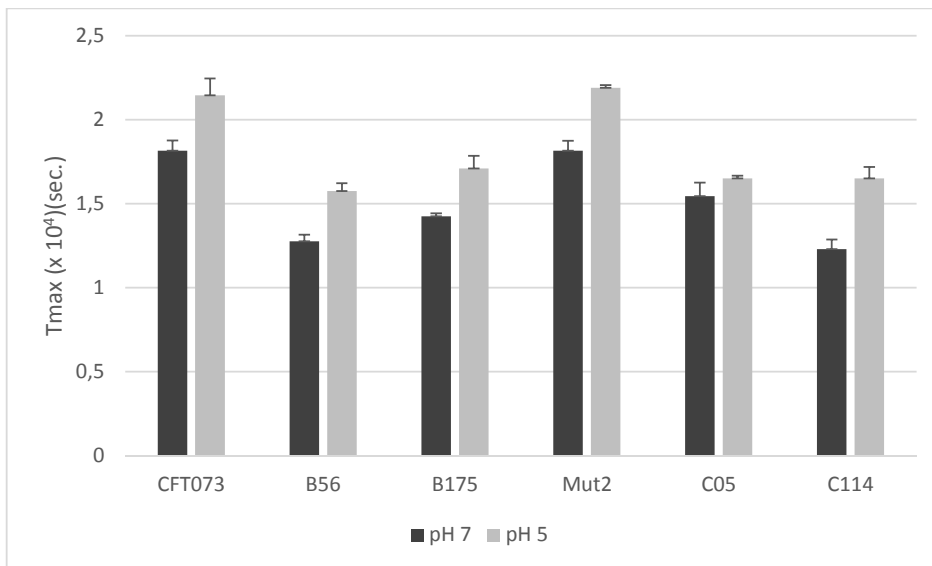

8

9 Time to achieve MGR (Tmax) was significantly prolonged ( $P < 0.05$ ) at pH 5 as compared with  
10 pH 7 for all strains except C05.
